# Supplementary material for: Self-assembled graphene coupled hollow-structured γ-Fe2O3 spheres with crystal of transition for enhanced supercapacitors
Source: Royal Society of Chemistry journal article supplement (doi:10.1039/c5ra23960e), 2016-01-01
Supplement: c5ra23960e1.pdf [file c5ra23960e1.pdf]

## Supporting Information

### **Self-assembled Graphene Coupled Hollow-Structured $\gamma$ -Fe<sub>2</sub>O<sub>3</sub> Spheres with Crystal of Transition for Enhanced Supercapacitors**

*Yilin Liu, Fan Liu, Yanwei Chen, Jianzhong Jiang, Yani Ai, Sheng Han\*, Hualin Lin\**

School of Chemical and Environmental Engineering, Shanghai Institute of  
Technology, Shanghai 201418, China.

**Table S1.** Physical and electrochemical properties reported in recent papers for FeOx-based electrodes in a negative potential range in various aqueous electrolytes.<sup>1-10</sup>

| Material                                             | Electrolyte                              | Measurement system | Specific Capacitance (F g <sup>-1</sup> ) | Method                       | Cycle life        | Ref. (year) |
|------------------------------------------------------|------------------------------------------|--------------------|-------------------------------------------|------------------------------|-------------------|-------------|
| Porous $\alpha$ -Fe <sub>2</sub> O <sub>3</sub> film | 1 M Li <sub>2</sub> SO <sub>4</sub>      | Three-electrode    | 146                                       | CV<br>5 mV s <sup>-1</sup>   | 500 (~60%)        | 2009        |
| $\alpha$ -Fe <sub>2</sub> O <sub>3</sub> NTs/ RGO    | 1 M Na <sub>2</sub> SO <sub>4</sub>      | Three-electrode    | 215                                       | CV<br>2.5 mV <sup>-1</sup>   | 2000 (stability ) | 2012        |
| Mesoporous $\alpha$ -Fe <sub>2</sub> O <sub>3</sub>  | 1 M Li <sub>2</sub> SO <sub>4</sub>      | Three-electrode    | 116                                       | CD 0.75<br>A g <sup>-1</sup> | 1000 (74%)        | 2011        |
| Nanosized $\alpha$ -LiFeO <sub>2</sub>               | 0.5 M<br>Li <sub>2</sub> SO <sub>4</sub> | Three-electrode    | 40                                        | CV 5<br>mV <sup>-1</sup>     | 500 (100%)        | 2010        |
| FeOx-carbon nanofoams                                | 2.5 M<br>Li <sub>2</sub> SO <sub>4</sub> | Three-electrode    | 84                                        | CV 5<br>mV <sup>-1</sup>     | 1000 (~81%)       | 2010        |
| Fe <sub>3</sub> O <sub>4</sub> nanocrystal           | 1M Na <sub>2</sub> SO <sub>4</sub>       | Three-electrode    | 5.3                                       | CD 15<br>mA g <sup>-1</sup>  | Not reported      | 2003        |
| Fe <sub>3</sub> O <sub>4</sub> particles graphene    | 1 M KOH                                  | Three-electrode    | 220.1                                     | CD 0.5<br>A g <sup>-1</sup>  | 1000 (~78%)       | 2014        |
| Fe <sub>3</sub> O <sub>4</sub> /carbon nanosheets    | 1 M<br>Na <sub>2</sub> SO <sub>3</sub>   | Three-electrode    | 163.4                                     | CD 1 A<br>g <sup>-1</sup>    | 1000 (~85%)       | 2013        |
| Fe <sub>3</sub> O <sub>4</sub> nanoparticles         | 1 M<br>Na <sub>2</sub> SO <sub>3</sub>   | Three-electrode    | 207.7                                     | CD 0.4<br>A g <sup>-1</sup>  | Not reported      | 2013        |

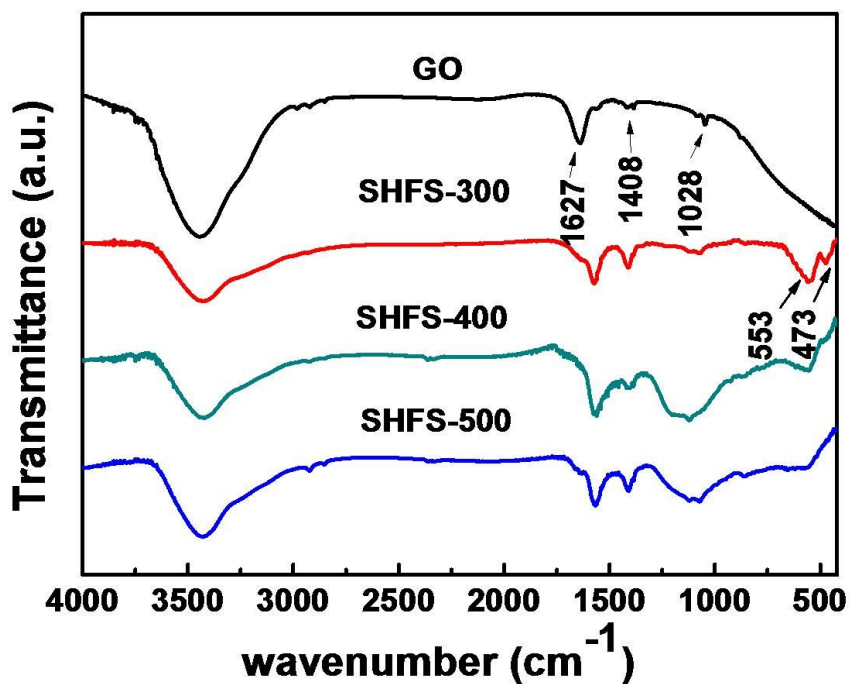

Fig S1. Fourier transform infrared spectra of Self-assembled Graphene Coupled Hollow-Structured  $\gamma\text{-Fe}_2\text{O}_3$  Spheres (SHFS-300, SHFS-400, SHFS-500) and GO.

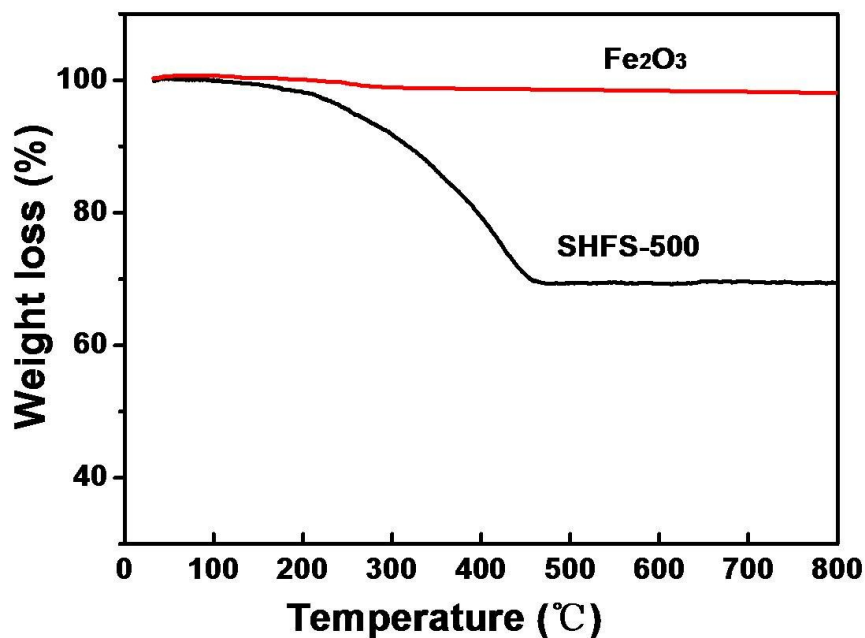

Fig S2. TGA curve of SHFS-500 under air at a rate of  $10^{\circ}\text{C min}^{-1}$  from 50 to 800  $^{\circ}\text{C}$ . The mass ratio of  $\gamma\text{-Fe}_2\text{O}_3$  is 68.7% in SHFS-500.

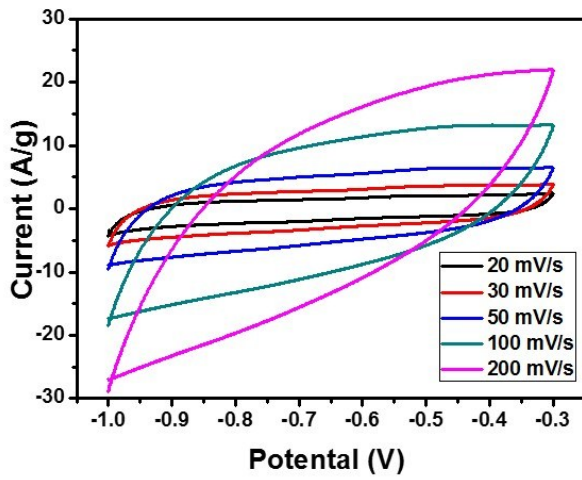

Fig S3. CV curves of SHFS at different scan rates.

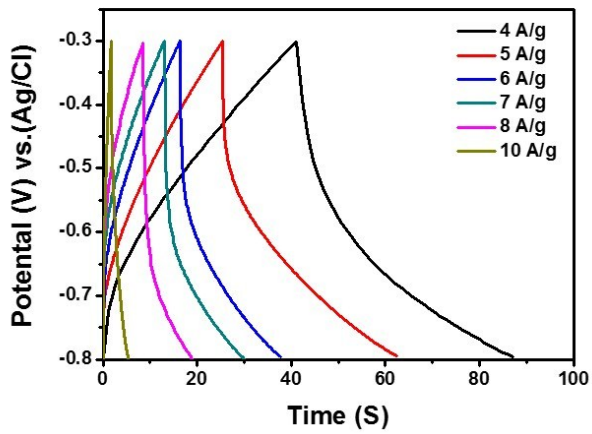

Fig S4. CD curves of SHFS at different current densities.

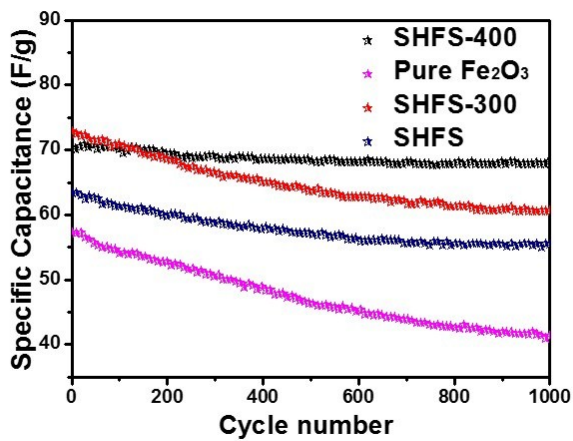

Fig S5. Cycle life of SHFS, SHF-300 and SHF-400 pure  $\text{Fe}_2\text{O}_3$  at  $10 \text{ A g}^{-1}$  in  $1 \text{ M Na}_2\text{SO}_4$

solution.

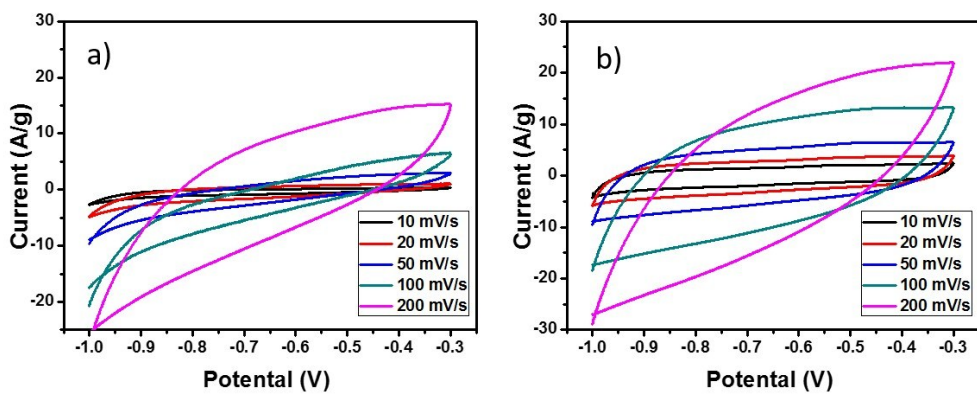

Fig S6. (a,b) CV curves of SHF-300 and SHFS-400 at different scan rates.

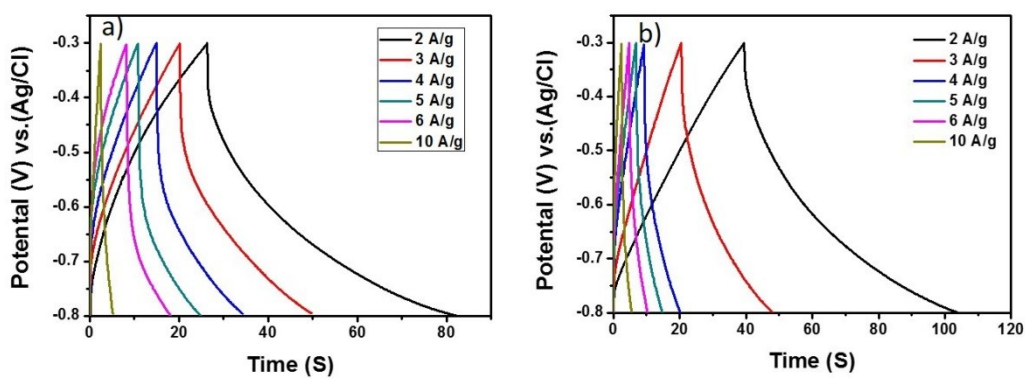

Fig S7. (a,b) CD curves of SHF-300 and SHFS-400 at different current densities.

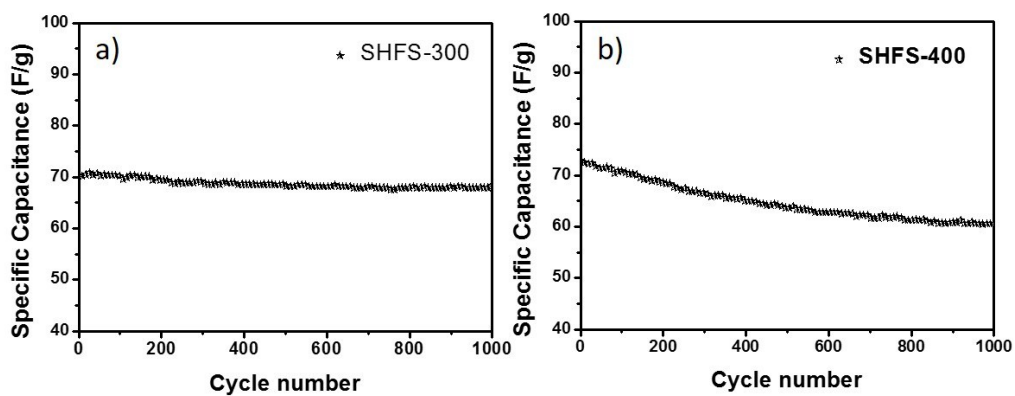

Fig S8. (a,b) Cycle life of SHF-300 and SHF-400 at  $10 \text{ A g}^{-1}$  in  $1 \text{ M Na}_2\text{SO}_4$  solution.

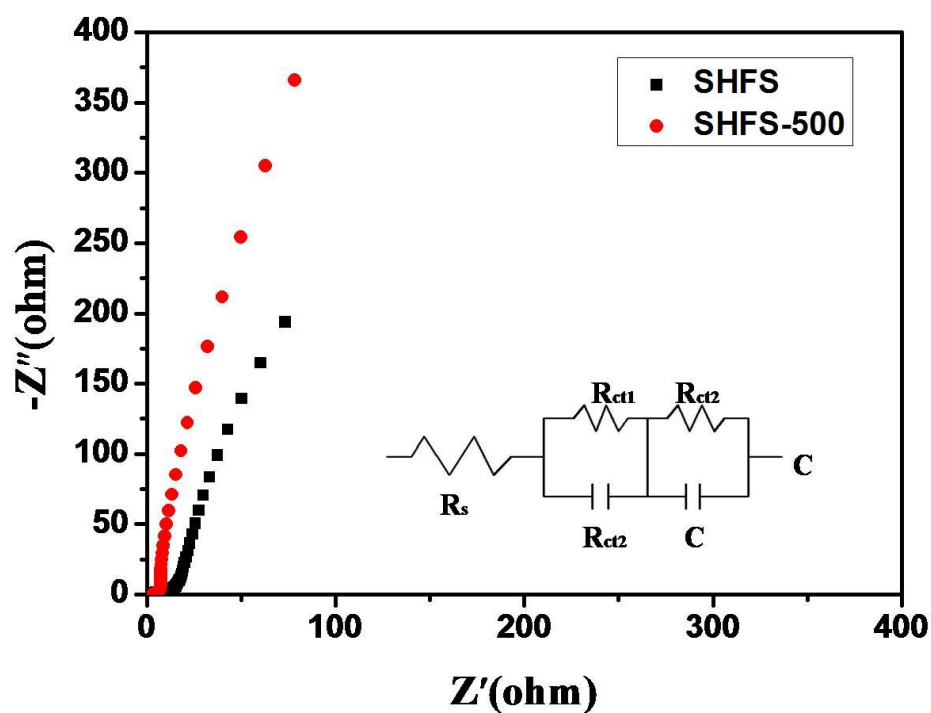

Fig S9. EIS spectra of the electrode material SHFS and SHFS-500.

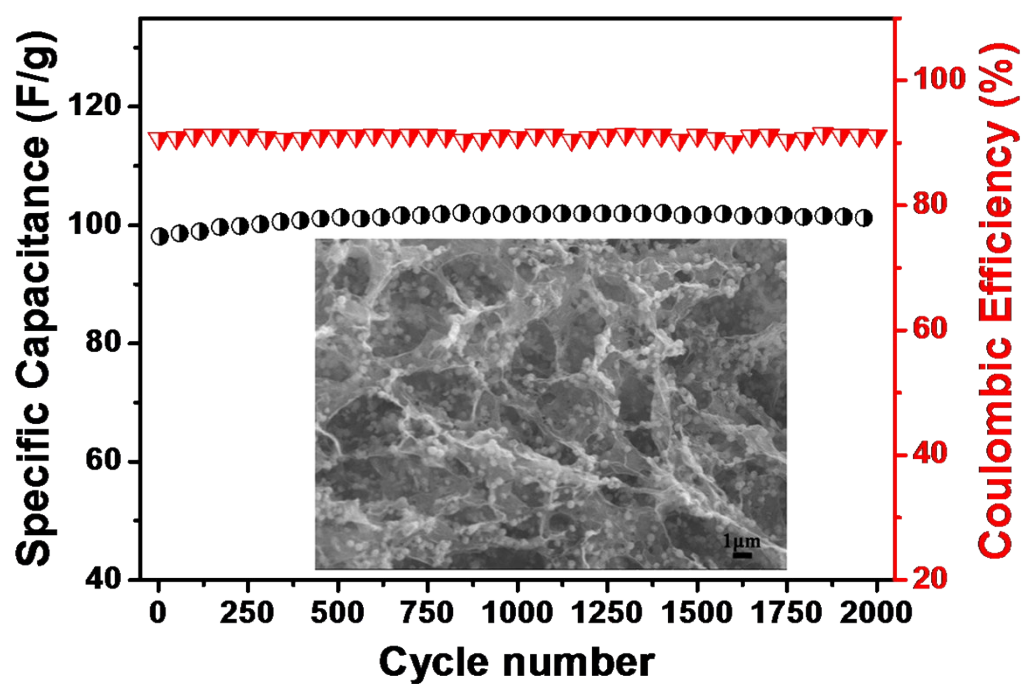

Fig S10. Cycle life of SHFS-500 at  $10 \text{ A g}^{-1}$  in  $1 \text{ M Na}_2\text{SO}_4$  solution.

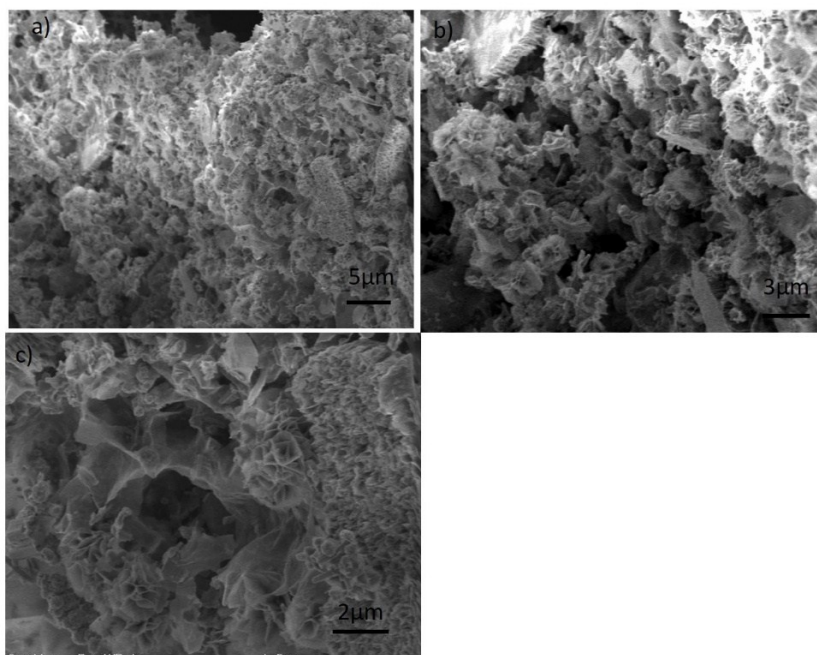

**Fig S11.** (a–b) Typical SEM image of pure  $\text{Fe}_2\text{O}_3$  nanoparticles.

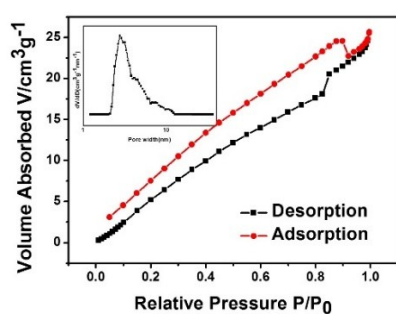

**Fig S12.** Nitrogen adsorption and desorption isotherms and the corresponding pore size distribution curve of pure  $\text{Fe}_2\text{O}_3$ .

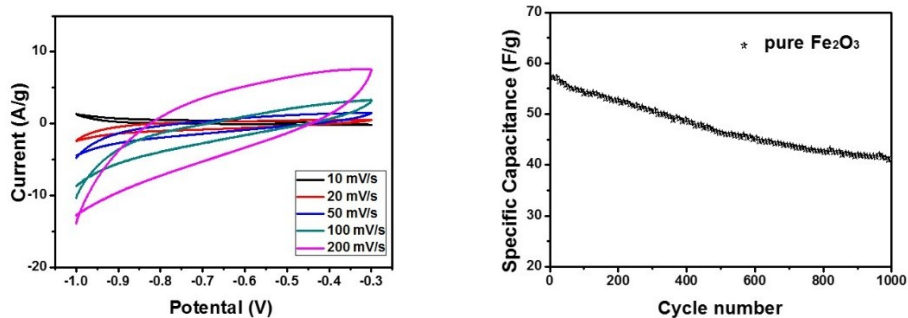

**Fig S13.** (a) CV curves of pure  $\text{Fe}_2\text{O}_3$  at different scan rates. (b) Cycle life of pure  $\text{Fe}_2\text{O}_3$  at  $10\text{A g}^{-1}$  in  $1\text{ M Na}_2\text{SO}_4$  solution.

## References

1. M.-S. Wu and R.-H. Lee, *Journal of The Electrochemical Society*, 2009, **156**, A737-A743.
2. K. Lee, S. Deng, H. M. Fan, S. Mhaisalkar, H. Tan, E. S. Tok, K. Loh, W. Chin and C. H. Sow, *Nanoscale*, 2012, **4**, 2958-2961.
3. J. Santos-Pena, O. Crosnier and T. Brousse, *Electrochimica Acta*, 2010, **55**, 7511-7515.
4. D. Wang, Q. Wang and T. Wang, *Nanotechnology*, 2011, **22**, 135604.
5. N.-L. Wu, S.-Y. Wang, C.-Y. Han, D.-S. Wu and L.-R. Shiue, *Journal of Power Sources*, 2003, **113**, 173-178.
6. S. Wang and N. Wu, *Journal of applied electrochemistry*, 2003, **33**, 345-348.
7. Q. Wang, L. Jiao, H. Du, Y. Wang and H. Yuan, *Journal of Power Sources*, 2014, **245**, 101-106.
8. D. Liu, X. Wang, X. Wang, W. Tian, J. Liu, C. Zhi, D. He, Y. Bando and D. Golberg, *Journal of Materials Chemistry A*, 2013, **1**, 1952-1955.
9. L. Wang, H. Ji, S. Wang, L. Kong, X. Jiang and G. Yang, *Nanoscale*, 2013, **5**, 3793-3799.
10. K. W. Chung, K. B. Kim, S.-H. Han and H. Lee, *Electrochemical and Solid-State Letters*, 2005, **8**, A259-A262.
